# Supplementary material for: Interpretation of personal genome sequencing data in terms of disease ranks based on mutual information
Source: PubMed Central journal article supplement (PMC4460593; doi:10.1186/1755-8794-8-s2-s4), 2015-05-29
Supplement: 1755-8794-8-S2-S4-S2.pdf [file 1755-8794-8-S2-S4-S2.pdf]

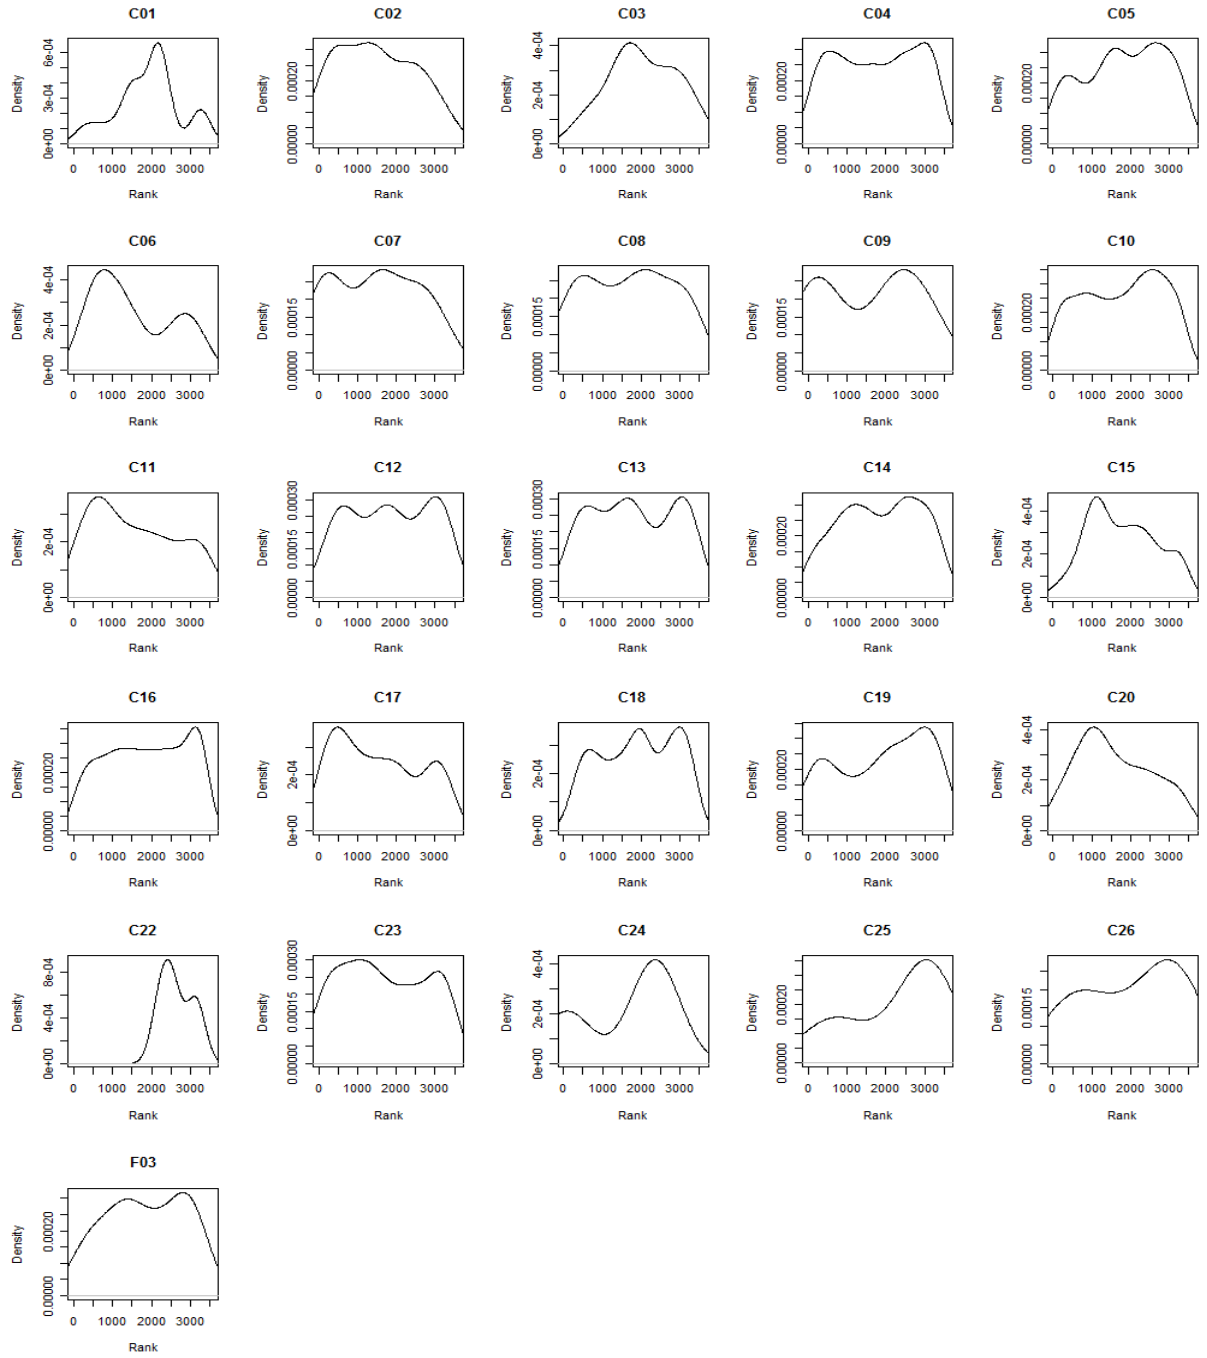

| Code | Term Name                                                       |
|------|-----------------------------------------------------------------|
| C01  | Bacterial Infections and Mycoses                                |
| C02  | Virus Diseases                                                  |
| C03  | Parasitic Diseases                                              |
| C04  | Neoplasms                                                       |
| C05  | Musculoskeletal Diseases                                        |
| C06  | Digestive System Diseases                                       |
| C07  | Stomatognathic Diseases                                         |
| C08  | Respiratory Tract Diseases                                      |
| C09  | Otorhinolaryngologic Diseases                                   |
| C10  | Nervous System Diseases                                         |
| C11  | Eye Diseases                                                    |
| C12  | Male Urogenital Diseases                                        |
| C13  | Female Urogenital Diseases and Pregnancy Complications          |
| C14  | Cardiovascular Diseases                                         |
| C15  | Hemic and Lymphatic Diseases                                    |
| C16  | Congenital, Hereditary, and Neonatal Diseases and Abnormalities |
| C17  | Skin and Connective Tissue Diseases                             |
| C18  | Nutritional and Metabolic Diseases                              |
| C19  | Endocrine System Diseases                                       |
| C20  | Immune System Diseases                                          |
| C21  | Disorders of Environmental Origin                               |
| C22  | Animal Diseases                                                 |
| C23  | Pathological Conditions, Signs and Symptoms                     |
| C24  | Occupational Diseases                                           |
| C25  | Substance-Related Disorders                                     |
| C26  | Wounds and Injuries                                             |
| F03  | Mental Disorders                                                |
